# Supplementary material
Source: Springer Nature journal article supplement (https://www.springermedizin.de/resource/supplementary/12958_2008_453_MOESM2_ESM.pdf/9567924)
Supplement: MOESM2 [file 9567924]

## **Figure 2: IVM and cryopreservation of oocytes**

### *Advantages*

Immediate harvesting in case of IVM (can start treatment without delay)

No male partner/gamete donor needed

Complete gonadotoxic and or ionizing radiation treatment without exposing gametes

Preserve fertility

Avoid risk of cancer re-transmission

IVM suitable for prepubertal girls

IVM is best suited for patients with polycystic ovaries containing numerous small antral follicles

Oocyte cryopreservation becoming more successful

### *Disadvantages*

Oocytes sensitive to cryoinjury

Requires surgical procedures for tissue harvesting or follicle aspiration

Oocyte retrieval requires 2 to 3 weeks for induction of multiple follicular maturation (place patient at risk of ovarian hyperstimulation syndrome)

Oocyte retrieval not suitable for prepubertal girls

IVM has low success rate
